# Supplementary material for: Mutation adjacent to the active site tyrosine can enhance DNA cleavage and cell killing by the TOPRIM Gly to Ser mutant of bacterial topoisomerase I
Source: PubMed Central journal article supplement — Nucleic Acids Res. 2007 Dec 20;36(3):1017–25. doi: 10.1093/nar/gkm1126 (PMC2241903; doi:10.1093/nar/gkm1126), 2007-12-20

**Supplementary Figure 1. Non-covalent binding of oligonucleotide substrate by wild-type and mutant ETOP enzymes.** Gel shift assay was used to compare the fraction of 5'-end labeled oligonucleotide substrate bound by wild-type ETOP (x), ETOP-G116S (■) and ETOP-116S/M320V (○) enzymes in the absence of MgCl<sub>2</sub>. After electrophoresis in a non-denaturing acrylamide gel, the radioactive signals of the unbound oligonucleotide DNA substrate and shifted band of the protein-DNA complex were quantitated by PhosphorImager analysis.

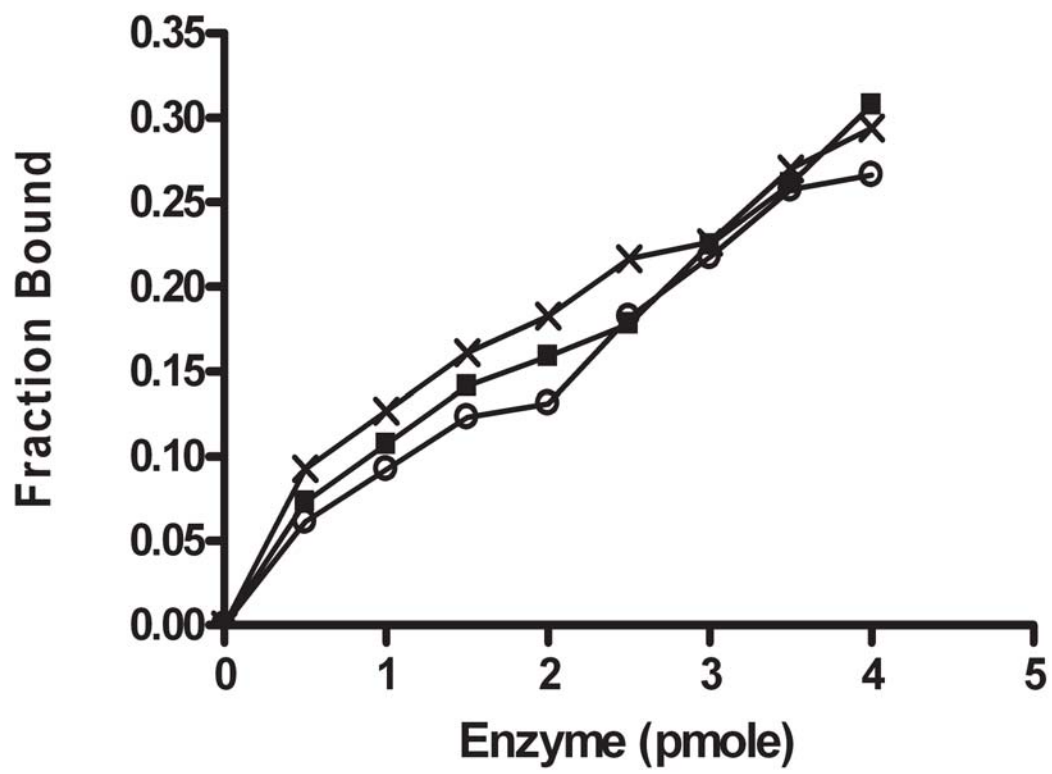

Supplement: nar_gkm1126_1.pdf [file nar_gkm1126_1.pdf]
